# Supplementary material for: Substituent position-induced diverse architectures of polyoxovanadate-based hybrid materials constructed from a linear trinuclear transition metal complex and a hexanuclear [V6O18]6−cluster
Source: Royal Society of Chemistry journal article supplement (doi:10.1039/c4ce00988f), 2014-06-26
Supplement: c4ce00988f1.pdf [file c4ce00988f1.pdf]

Supplementary Material (ESI) for CrystEngComm  
This journal is © The Royal Society of Chemistry

---

**Substituent position-induced diverse architectures of polyoxovanadate-based hybrid materials constructed from linear trinuclear transition metal complex and hexanuclear  $[V_6O_{18}]^{6-}$  cluster**

Xiu-Li Wang,\* Chun-Hua Gong, Ju-Wen Zhang, Li-Li Hou, Jian Luan, Guo-Cheng Liu

*Department of Chemistry, Bohai University, Liaoning Province Silicon Materials Engineering Technology Research Centre, Jinzhou, 121000, P. R. China*

**Table S1** Selected bond distances (Å) and angles (°) for compounds **1–4**.

| <b>1</b>                                                                                                               |            |                  |            |
|------------------------------------------------------------------------------------------------------------------------|------------|------------------|------------|
| Ni(1)–O(1)                                                                                                             | 2.053(4)   | V(1)–O(1)        | 1.645(2)   |
| Ni(1)–N(1)                                                                                                             | 2.0732(19) | V(1)–O(2)        | 1.795(2)   |
| Ni(2)–N(2)                                                                                                             | 2.1204     | V(1)–O(3)        | 1.620(4)   |
| N(1)–Ni(1)–N(1)#2                                                                                                      | 92.10(15)  | O(1)–V(1)–O(2)   | 112.16(11) |
| N(1)–Ni(1)–O(1)#1                                                                                                      | 90.12(12)  | O(1)–V(1)–O(2)#3 | 110.62(13) |
| N(1)#1–Ni(1)–O(1)                                                                                                      | 177.48(12) | O(2)–V(1)–O(2)#3 | 110.76(6)  |
| N(1)–Ni(1)–O(1)                                                                                                        | 89.01(12)  | O(3)–V(1)–O(2)#3 | 108.46(19) |
| O(1)#1–Ni(1)–O(1)                                                                                                      | 88.72(8)   | O(3)–V(1)–O(1)   | 107.91(19) |
| N(2)#4–Ni(2)–N(2)                                                                                                      | 180.00(18) | O(3)–V(1)–O(2)   | 106.75(18) |
| N(2)#5–Ni(2)–N(2)                                                                                                      | 90.16(7)   |                  |            |
| N(2)–Ni(2)–N(2)#2                                                                                                      | 89.84(7)   |                  |            |
| Symmetry codes: #1 $-x + y, -x, z$ ; #2 $-y, x - y, z$ ; #3 $x - y, x, -z - 1$ ; #4 $-x, -y, -z$ ; #5 $x - y, x, -z$ . |            |                  |            |
| <b>2</b>                                                                                                               |            |                  |            |
| Ni(1)–O(1)                                                                                                             | 2.069(3)   | V(1)–O(1)        | 1.641(2)   |
| Ni(1)–O(5)                                                                                                             | 2.056(2)   | V(1)–O(2)        | 1.788(3)   |
| Ni(1)–O(8)                                                                                                             | 2.029(3)   | V(1)–O(3)        | 1.795(3)   |
| Ni(1)–N(1)                                                                                                             | 2.062(3)   | V(1)–O(4)        | 1.623(3)   |
| Ni(1)–N(4)                                                                                                             | 2.058(3)   | V(2)–O(5)        | 1.658(2)   |
| Ni(1)–N(8)                                                                                                             | 2.052(3)   | V(2)–O(6)        | 1.770(3)   |
| Ni(2)–N(2)                                                                                                             | 2.106(3)   | V(2)–O(7)        | 1.614(3)   |
| Ni(2)–N(3)                                                                                                             | 2.104(3)   | V(2)–O(2)#2      | 1.785(3)   |
| Ni(2)–N(7)                                                                                                             | 2.115(3)   | V(3)–O(8)        | 1.640(3)   |
|                                                                                                                        |            | V(3)–O(9)        | 1.606(3)   |
|                                                                                                                        |            | V(3)–O(3)#4      | 1.791(3)   |
|                                                                                                                        |            | V(3)–O(6)#3      | 1.781(3)   |

---

\* Corresponding author. Tel: +86-416-3400158 E-mail address: [wangxiuli@bhu.edu.cn](mailto:wangxiuli@bhu.edu.cn) (X.-L. Wang)

|                   |            |                    |            |
|-------------------|------------|--------------------|------------|
| O(8)–Ni(1)–N(8)   | 94.01(11)  | O(4)–V(1)–O(1)     | 109.06(15) |
| O(8)–Ni(1)–O(5)   | 89.49(10)  | O(4)–V(1)–O(2)     | 108.32(17) |
| N(8)–Ni(1)–O(5)   | 90.05(10)  | O(1)–V(1)–O(2)     | 109.35(14) |
| O(8)–Ni(1)–N(4)   | 171.30(11) | O(4)–V(1)–O(3)     | 109.38(14) |
| N(8)–Ni(1)–N(4)   | 94.22(11)  | O(1)–V(1)–O(3)     | 110.11(13) |
| O(5)–Ni(1)–N(4)   | 87.70(10)  | O(2)–V(1)–O(3)     | 110.58(13) |
| O(8)–Ni(1)–N(1)   | 93.27(11)  | O(7)–V(2)–O(5)     | 109.96(14) |
| N(8)–Ni(1)–N(1)   | 86.26(11)  | O(7)–V(2)–O(6)     | 110.66(18) |
| O(5)–Ni(1)–N(1)   | 175.54(10) | O(5)–V(2)–O(6)     | 107.08(13) |
| N(4)–Ni(1)–N(1)   | 90.06(11)  | O(7)–V(2)–O(2)#2   | 107.35(16) |
| O(8)–Ni(1)–O(1)   | 84.05(11)  | O(5)–V(2)–O(2)#2   | 110.90(12) |
| N(8)–Ni(1)–O(1)   | 177.88(11) | O(6)–V(2)–O(2)#2   | 110.93(17) |
| O(5)–Ni(1)–O(1)   | 90.79(10)  | O(9)–V(3)–O(8)     | 107.45(18) |
| N(4)–Ni(1)–O(1)   | 87.76(11)  | O(9)–V(3)–O(6)#3   | 108.6(2)   |
| N(1)–Ni(1)–O(1)   | 92.98(11)  | O(8)–V(3)–O(6)#3   | 108.59(16) |
| N(3)–Ni(2)–N(3)#1 | 180        | O(9)–V(3)–O(3)#4   | 110.49(17) |
| N(3)–Ni(2)–N(2)   | 90.44(11)  | O(8)–V(3)–O(3)#4   | 110.10(13) |
| N(3)#1–Ni(2)–N(2) | 89.56(11)  | O(6)#3–V(3)–O(3)#4 | 111.52(14) |
| N(2)–Ni(2)–N(2)#1 | 179.999(1) |                    |            |
| N(3)–Ni(2)–N(7)   | 90.74(10)  |                    |            |
| N(2)–Ni(2)–N(7)   | 88.96(11)  |                    |            |
| N(3)–Ni(2)–N(7)#1 | 89.26(10)  |                    |            |
| N(2)–Ni(2)–N(7)#1 | 91.04(11)  |                    |            |
| N(7)–Ni(2)–N(7)#1 | 180        |                    |            |

Symmetry codes: #1  $-x, -y + 1, -z$ ; #2  $-x, -y + 1, -z + 1$ ; #3  $-x + 1, -y + 1, -z + 1$ ; #4  $-x + 1, -y + 2, -z + 1$ .

### 3

|                     |            |                  |            |
|---------------------|------------|------------------|------------|
| Co(1)–O(1)          | 2.058(3)   | V(1)–O(1)        | 1.660(3)   |
| Co(1)–O(5)#1        | 2.063(3)   | V(1)–O(2)        | 1.619(4)   |
| Co(1)–O(9)#2        | 2.085(3)   | V(1)–O(3)        | 1.773(3)   |
| Co(1)–N(1)          | 2.120(4)   | V(1)–O(8)#3      | 1.783(3)   |
| Co(1)–N(5)          | 2.119(3)   | V(2)–O(3)        | 1.775(3)   |
| Co(1)–N(9)          | 2.122(3)   | V(2)–O(4)        | 1.607(4)   |
| Co(2)–N(2)          | 2.160(3)   | V(2)–O(5)        | 1.640(3)   |
| Co(2)–N(6)          | 2.147(3)   | V(2)–O(6)        | 1.795(3)   |
| Co(2)–N(10)         | 2.153(3)   | V(3)–O(6)        | 1.792(3)   |
|                     |            | V(3)–O(7)        | 1.616(3)   |
|                     |            | V(3)–O(8)        | 1.789(3)   |
|                     |            | V(3)–O(9)        | 1.643(3)   |
| O(1)–Co(1)–O(5)#1   | 90.62(13)  | O(2)–V(1)–O(1)   | 109.55(18) |
| O(1)–Co(1)–O(9)#2   | 91.95(13)  | O(2)–V(1)–O(3)   | 111.0(2)   |
| O(5)#1–Co(1)–O(9)#2 | 84.10(14)  | O(1)–V(1)–O(3)   | 107.20(16) |
| O(1)–Co(1)–N(5)     | 87.91(13)  | O(2)–V(1)–O(8)#3 | 107.50(19) |
| O(5)#1–Co(1)–N(5)   | 171.56(14) | O(1)–V(1)–O(8)#3 | 110.87(16) |

|                                                                                                                  |            |                  |            |
|------------------------------------------------------------------------------------------------------------------|------------|------------------|------------|
| O(9)#2–Co(1)–N(5)                                                                                                | 87.64(14)  | O(3)–V(1)–O(8)#3 | 110.7(2)   |
| O(1)–Co(1)–N(1)                                                                                                  | 89.41(13)  | O(4)–V(2)–O(5)   | 107.1(2)   |
| O(5)#1–Co(1)–N(1)                                                                                                | 94.72(14)  | O(4)–V(2)–O(3)   | 108.7(2)   |
| O(9)#2–Co(1)–N(1)                                                                                                | 178.21(14) | O(5)–V(2)–O(3)   | 108.8(2)   |
| N(5)–Co(1)–N(1)                                                                                                  | 93.58(13)  | O(4)–V(2)–O(6)   | 110.7(2)   |
| O(1)–Co(1)–N(9)                                                                                                  | 173.36(12) | O(5)–V(2)–O(6)   | 109.69(17) |
| O(5)#1–Co(1)–N(9)                                                                                                | 93.33(14)  | O(3)–V(2)–O(6)   | 111.74(17) |
| O(9)#2–Co(1)–N(9)                                                                                                | 93.77(14)  | O(7)–V(3)–O(9)   | 108.92(19) |
| N(5)–Co(1)–N(9)                                                                                                  | 88.95(14)  | O(7)–V(3)–O(8)   | 108.0(2)   |
| N(1)–Co(1)–N(9)                                                                                                  | 84.95(14)  | O(9)–V(3)–O(8)   | 109.55(18) |
| N(6)–Co(2)–N(6)#4                                                                                                | 180        | O(7)–V(3)–O(6)   | 109.54(18) |
| N(6)–Co(2)–N(10)                                                                                                 | 90.52(13)  | O(9)–V(3)–O(6)   | 110.10(17) |
| N(6)–Co(2)–N(10)#4                                                                                               | 89.48(13)  | O(8)–V(3)–O(6)   | 110.68(16) |
| N(10)–Co(2)–N(10)#4                                                                                              | 180.000(1) |                  |            |
| N(6)–Co(2)–N(2)                                                                                                  | 90.82(13)  |                  |            |
| N(10)–Co(2)–N(2)                                                                                                 | 88.29(13)  |                  |            |
| N(6)–Co(2)–N(2)#4                                                                                                | 89.18(13)  |                  |            |
| N(10)–Co(2)–N(2)#4                                                                                               | 91.71(13)  |                  |            |
| N(2)–Co(2)–N(2)#4                                                                                                | 180        |                  |            |
| Symmetry codes: #1 $-x + 2, -y, -z + 1$ ; #2 $x, y + 1, z$ ; #3 $-x + 1, -y - 1, -z + 1$ ; #4 $-x + 1, -y, -z$ . |            |                  |            |

4

|                 |            |                    |            |
|-----------------|------------|--------------------|------------|
| Zn(1)–O(1)      | 2.0913(19) | V(1)–O(1)#1        | 1.6491(19) |
| Zn(1)–O(2)      | 2.123(2)   | V(1)–O(3)          | 1.608(2)   |
| Zn(1)–O(5)      | 2.052(2)   | V(1)–O(4)          | 1.774(2)   |
| Zn(1)–N(1)      | 2.144(2)   | V(1)–O(8)#2        | 1.785(2)   |
| Zn(1)–N(5)      | 2.138(2)   | V(2)–O(4)          | 1.769(2)   |
| Zn(1)–N(9)      | 2.138(2)   | V(2)–O(5)          | 1.645(2)   |
| Zn(2)–N(2)      | 2.163(2)   | V(2)–O(6)          | 1.604(3)   |
| Zn(2)–N(6)      | 2.167(2)   | V(2)–O(7)          | 1.790(2)   |
| Zn(2)–N(10)     | 2.185(2)   | V(3)–O(2)#4        | 1.640(2)   |
|                 |            | V(3)–O(7)          | 1.793(2)   |
|                 |            | V(3)–O(8)          | 1.785(2)   |
|                 |            | V(3)–O(9)          | 1.625(2)   |
| O(5)–Zn(1)–O(1) | 90.71(9)   | O(3)–V(1)–O(1)#1   | 109.48(12) |
| O(5)–Zn(1)–O(2) | 83.20(10)  | O(3)–V(1)–O(4)     | 111.40(16) |
| O(1)–Zn(1)–O(2) | 91.58(8)   | O(1)#1–V(1)–O(4)   | 106.82(12) |
| O(5)–Zn(1)–N(9) | 96.45(9)   | O(3)–V(1)–O(8)#2   | 107.57(14) |
| O(1)–Zn(1)–N(9) | 89.16(8)   | O(1)#1–V(1)–O(8)#2 | 110.97(11) |
| O(2)–Zn(1)–N(9) | 179.18(8)  | O(4)–V(1)–O(8)#2   | 110.62(15) |
| O(5)–Zn(1)–N(5) | 169.14(10) | O(6)–V(2)–O(5)     | 107.62(15) |
| O(1)–Zn(1)–N(5) | 86.91(8)   | O(6)–V(2)–O(4)     | 108.64(18) |
| O(2)–Zn(1)–N(5) | 86.27(9)   | O(5)–V(2)–O(4)     | 108.54(14) |
| N(9)–Zn(1)–N(5) | 94.12(9)   | O(6)–V(2)–O(7)     | 110.62(15) |

|                     |           |                  |            |
|---------------------|-----------|------------------|------------|
| O(5)–Zn(1)–N(1)     | 94.45(9)  | O(5)–V(2)–O(7)   | 109.81(12) |
| O(1)–Zn(1)–N(1)     | 173.01(8) | O(4)–V(2)–O(7)   | 111.50(12) |
| O(2)–Zn(1)–N(1)     | 93.71(9)  | O(9)–V(3)–O(2)#4 | 108.68(13) |
| N(9)–Zn(1)–N(1)     | 85.58(9)  | O(9)–V(3)–O(8)   | 107.88(15) |
| N(5)–Zn(1)–N(1)     | 88.87(9)  | O(2)#4–V(3)–O(8) | 109.73(12) |
| N(2)–Zn(2)–N(2)#3   | 180       | O(9)–V(3)–O(7)   | 110.01(13) |
| N(2)–Zn(2)–N(6)#3   | 89.43(9)  | O(2)#4–V(3)–O(7) | 109.99(11) |
| N(2)–Zn(2)–N(6)     | 90.57(9)  | O(8)–V(3)–O(7)   | 110.50(11) |
| N(6)#3–Zn(2)–N(6)   | 180       |                  |            |
| N(2)–Zn(2)–N(10)#3  | 91.43(9)  |                  |            |
| N(6)–Zn(2)–N(10)#3  | 89.03(9)  |                  |            |
| N(2)–Zn(2)–N(10)    | 88.57(9)  |                  |            |
| N(6)–Zn(2)–N(10)    | 90.97(9)  |                  |            |
| N(10)#3–Zn(2)–N(10) | 180       |                  |            |

Symmetry codes: #1  $-x - 1, -y + 1, -z - 1$ ; #2  $-x - 2, -y, -z - 1$ ; #3  $-x, -y + 1, -z$ ; #4  $-x - 1, -y, -z - 1$ .

**Table S2** Selected hydrogen bonding geometry (Å, °) for compound **1**.

| D–H···A           | D–H  | H···A | D···A | D–H···A |
|-------------------|------|-------|-------|---------|
| N(4)–H(4B)···O(3) | 0.86 | 2.43  | 2.80  | 107     |

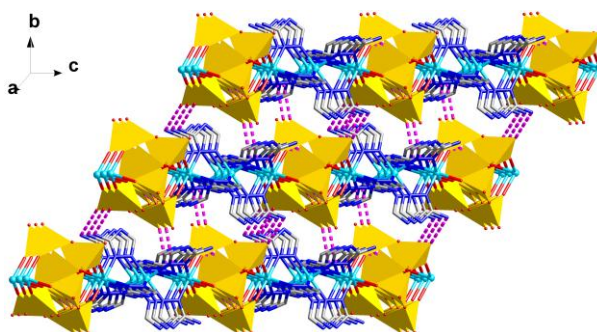

**Fig. S1** The 3D supramolecular framework formed by the hydrogen bonding interactions in **1**.

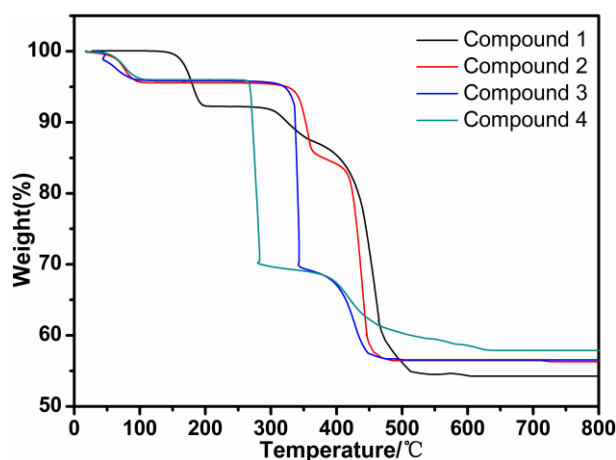

**Fig. S2** TG curves of compounds **1–4**.

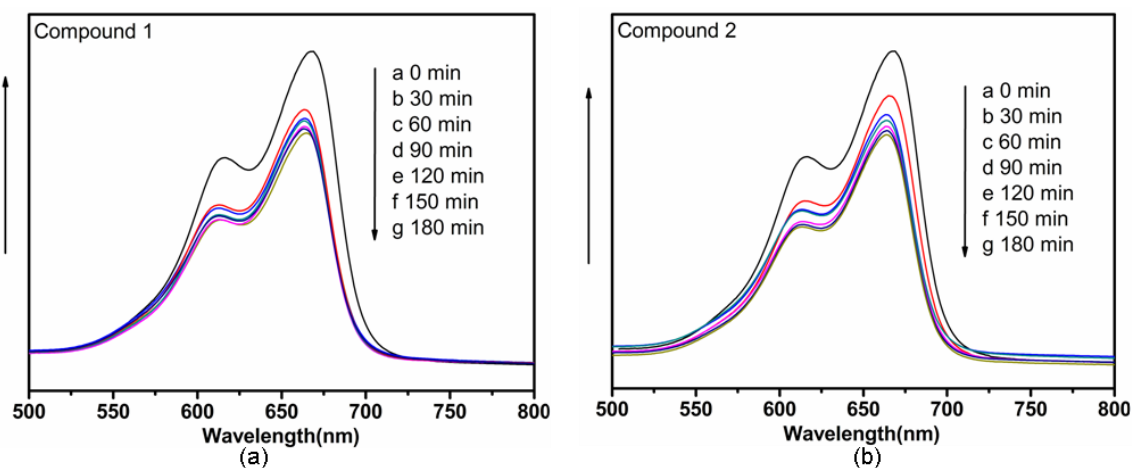

**Fig. S3** Absorption spectra of the MB solution during the decomposition reaction under UV irradiation with the presence of compounds **1** (a) and **2** (b).

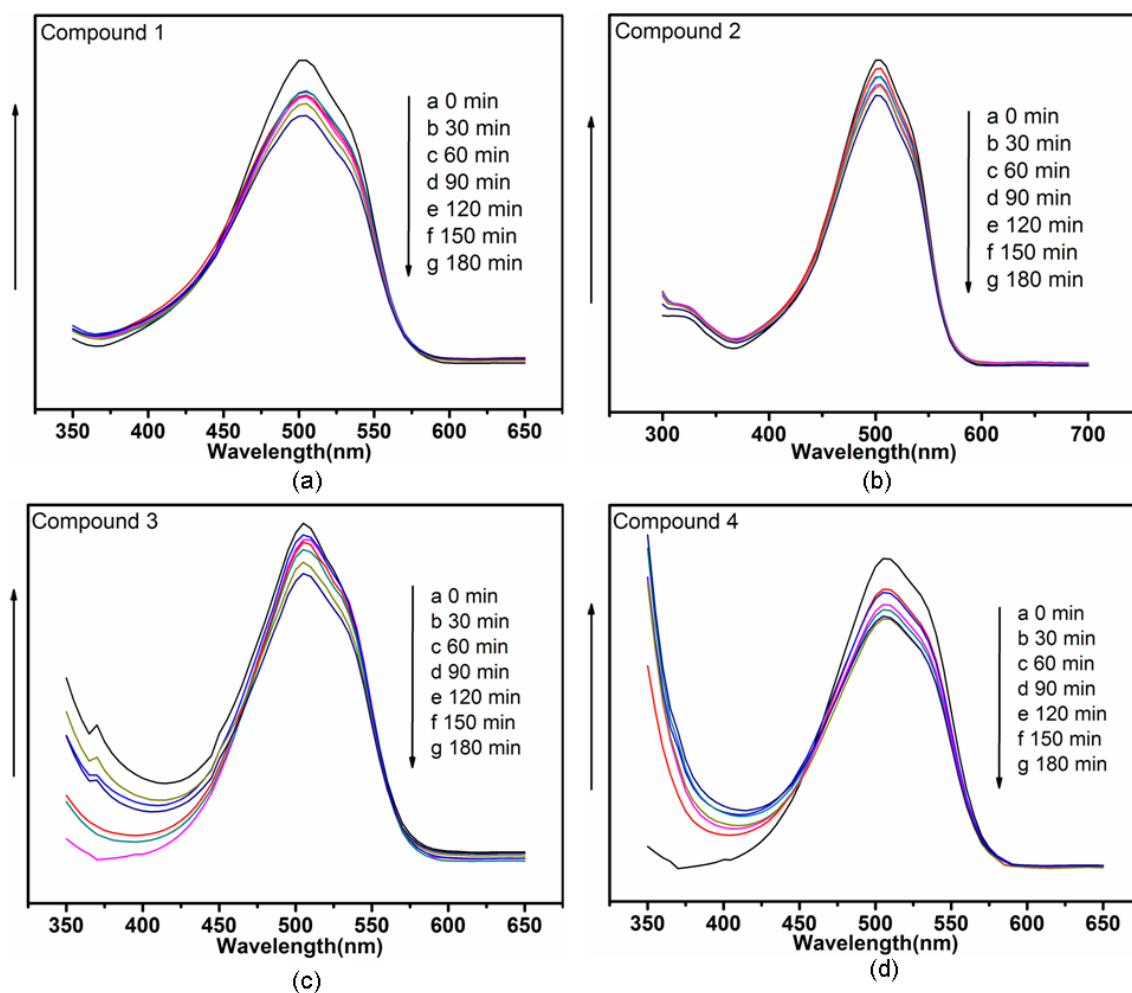

**Fig. S4** Absorption spectra of the MO solution during the decomposition reaction under UV irradiation with the presence of compounds **1** (a), **2** (b), **3** (c), **4** (d).

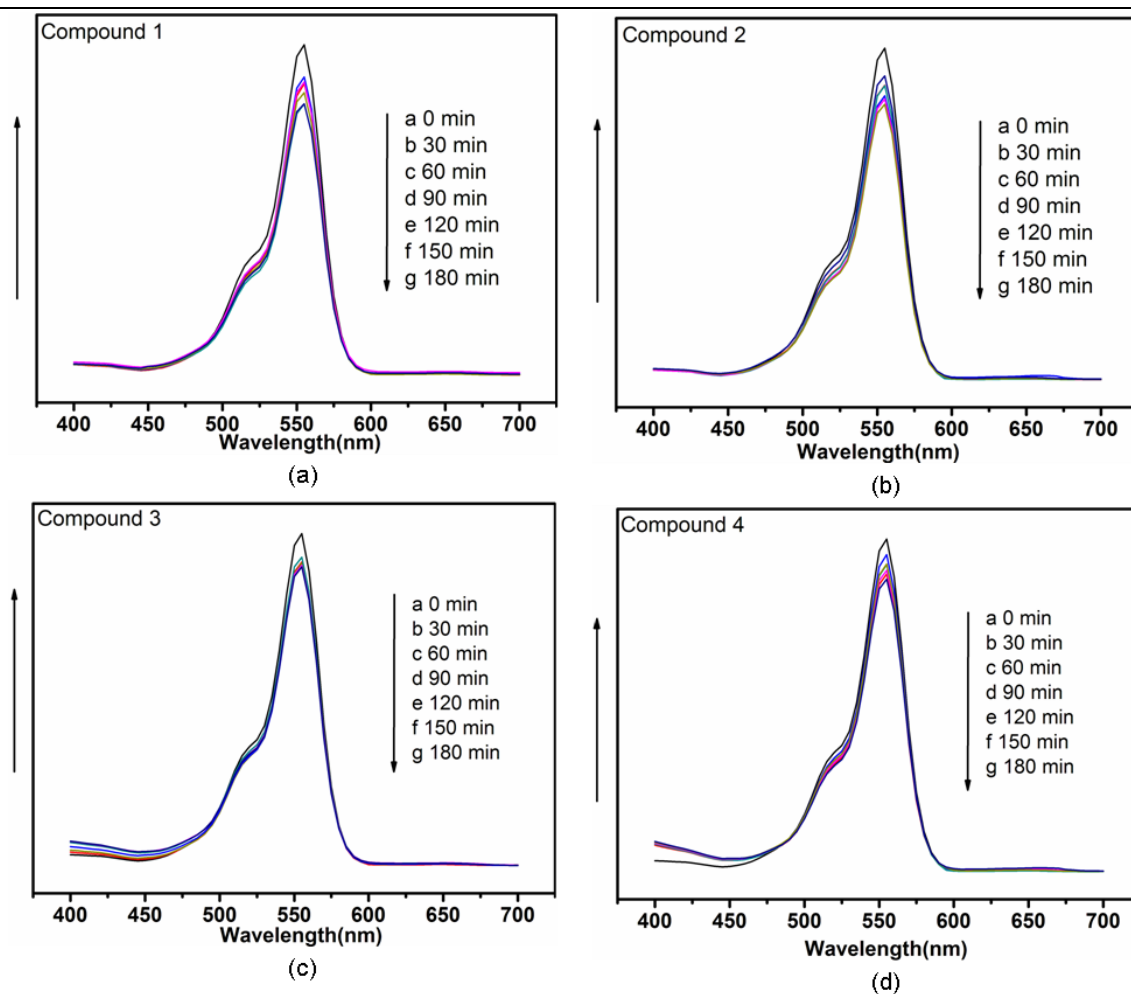

Fig. S5 Absorption spectra of the RhB solution during the decomposition reaction under UV irradiation with the presence of compounds 1 (a), 2 (b), 3 (c), 4 (d).

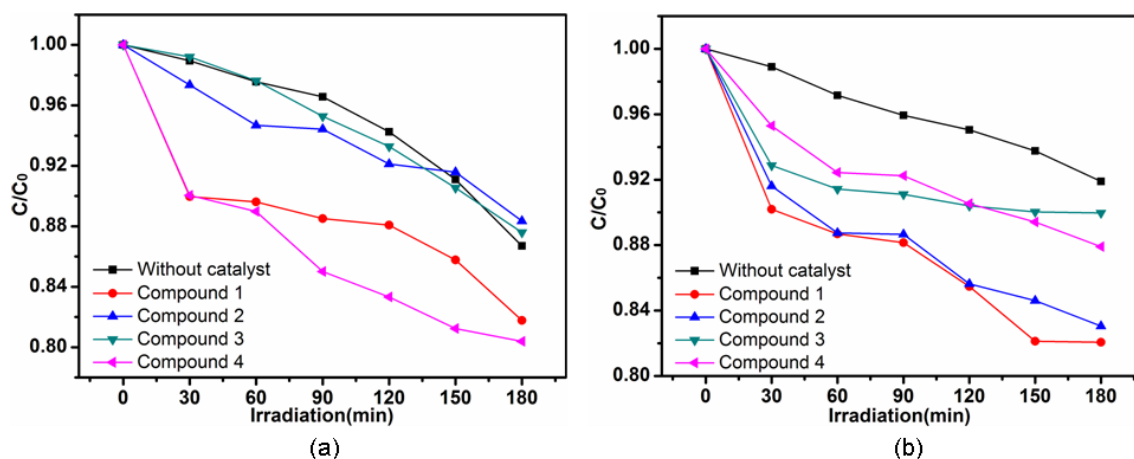

Fig. S6 Photocatalytic decomposition rate of the MO solution (a) and RhB solution (b) under UV irradiation with the use of compounds 1–4 and without catalyst in the same conditions.

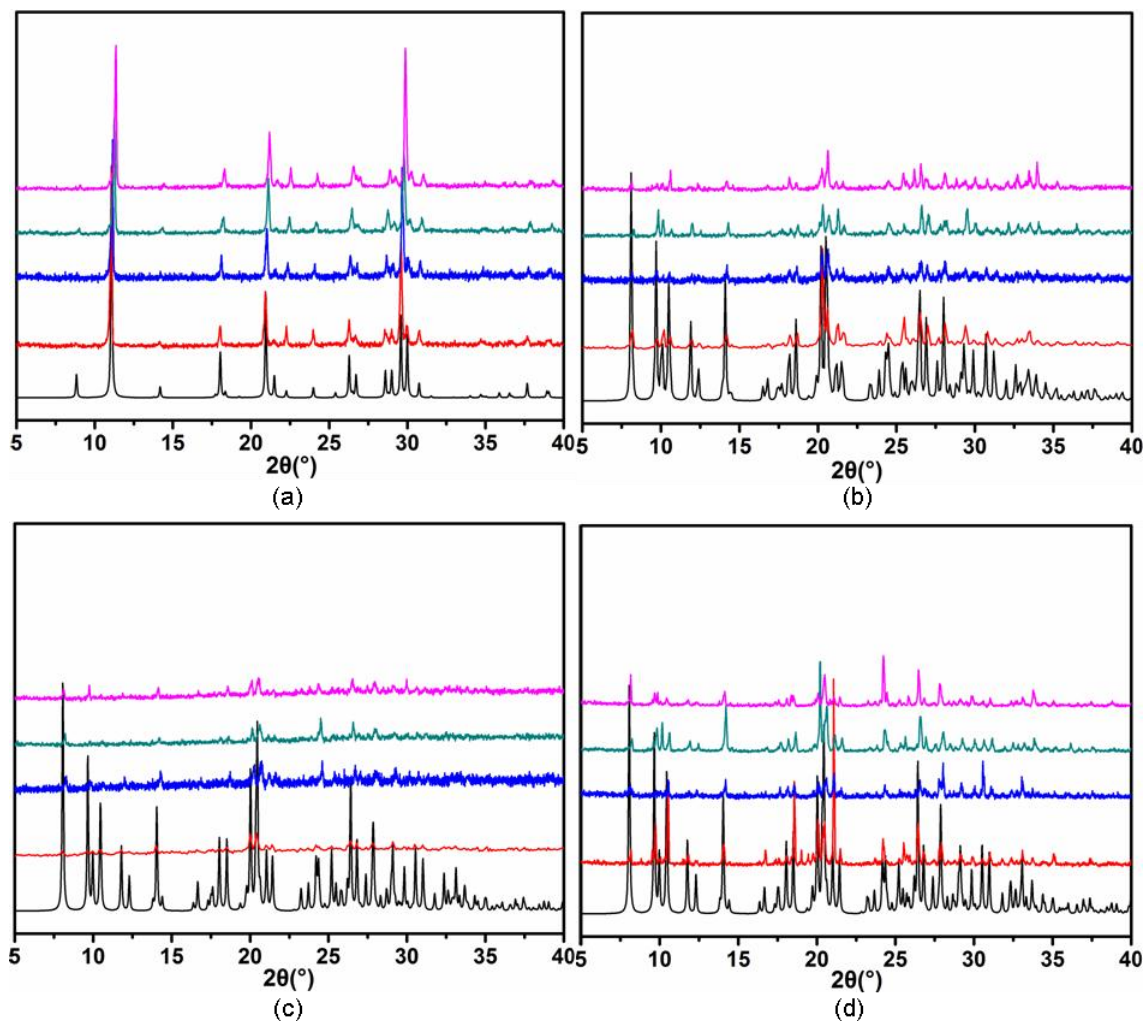

**Fig. S7** X-ray powder diffraction patterns of compounds **1** (a), **2** (b), **3** (c) and **4** (d) simulated from single-crystal X-ray data (black line), as-synthesized (red line) and after the photocatalytic reaction-MB (blue line), MO (dark cyan line) and RhB (magenta line).
